# Supplementary material
Source: publisher figshare collection journal article supplement (https://acs.figshare.com/ndownloader/files/3971032)
Supplement: Supplementary file 1 [file 3971032]

## *Supporting Information*

### **Synthesis and Characterization of Primary Aluminum Parent**

### **Amides and Phosphides**

Christopher E. Melton,<sup>a</sup> Jonathan W. Dube,<sup>b</sup> Paul J. Ragona,<sup>b,\*</sup> James C. Fetting,<sup>a</sup> and

Philip P. Power.<sup>a,\*</sup>

*a. Department of Chemistry, University of California, One Shields Avenue, Davis, CA 95616.*

*b. Department of Chemistry and The Center for Advanced Materials and Biomaterials Research (CAMBR),*

*The University of Western Ontario, London, Ontario, Canada N6A 5B7.*

#### Contents:

S1: Full  $^{31}\text{P}\{^1\text{H}\}$  NMR spectrum of the redissolved powder from the crude solid compound **4**.

S2: Full  $^{31}\text{P}$  NMR spectrum of the redissolved powder from the crude solid of compound **4**.

S3: Plots of the  $^{31}\text{P}\{^1\text{H}\}$  NMR spectrum (top) and  $^{31}\text{P}$  NMR spectrum (bottom) for compound **4**.

S4:  $^1\text{H}$  NMR spectrum for crystallized compound **4**.

S5: Plots of  $^{31}\text{P}\{^1\text{H}\}$  NMR spectrum (top), simulated spectrum (middle), and  $^{31}\text{P}$  NMR spectrum of compound **4** (bottom).

S6:  $^{31}\text{P}\{^1\text{H}\}$  -  $^{31}\text{P}\{^1\text{H}\}$  COSY NMR for compound **4**.

S7: Plots of the  $^{31}\text{P}\{^1\text{H}\}$  NMR spectra of the crude solid compound **4** and **5** (top) and small amount of isolated compound **5** (bottom).

S8:  $^{31}\text{P}\{^1\text{H}\}$  NMR spectrum of small amount of isolated compound **5**.

S9:  $^{31}\text{P}$  NMR spectrum of small amount of isolated compound **5**.

S10: Plots of the  $^{31}\text{P}\{^1\text{H}\}$  NMR spectrum (top) and  $^{31}\text{P}$  NMR spectrum (bottom) for compound **5**.

S11: Thermal ellipsoid plot of **4** without hydrogens, illustrating the disordered core structure.

S12:  $^1\text{H}$  NMR spectrum of  $(\text{Ar}^{\text{Pr}^i4}\text{AlH}_2)_2$  in  $\text{C}_6\text{D}_6$  at 25 °C.

S13:  $^1\text{H}$  NMR spectrum of  $(\text{Ar}^{\text{Pr}^i8}\text{AlH}_2)_2$  in  $\text{C}_6\text{D}_6$  at 25 °C.

S14:  $^1\text{H}$  NMR spectrum  $\text{LiAlH}_3\text{Ar}^{\text{Pr}^i4}$  in  $\text{C}_6\text{D}_6$  at 25 °C.

S15:  $^1\text{H}$  NMR spectrum of  $\text{LiAlH}_3\text{Ar}^{\text{Pr}^i8}$  in  $\text{C}_6\text{D}_6$  at 25 °C.

S16:  $^1\text{H}$  NMR spectrum of **1** in  $\text{C}_6\text{D}_6$  at 25 °C.

S17:  $^1\text{H}$  NMR spectrum of **3** in  $\text{C}_6\text{D}_6$  at 25 °C.

S18:  $^1\text{H}$  NMR spectrum of **2** in  $\text{C}_6\text{D}_6$  at 25 °C.

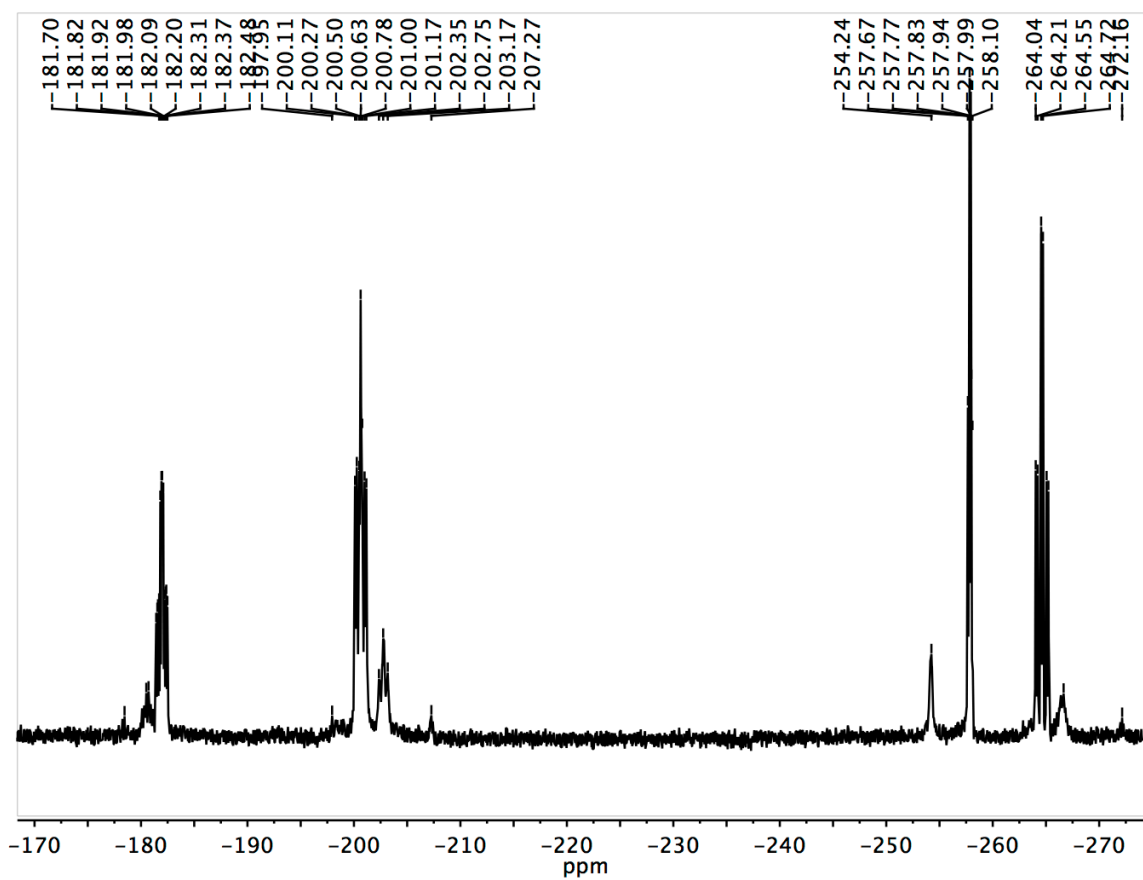

**S1:** Full  $^{31}\text{P}\{^1\text{H}\}$  NMR spectrum of the redissolved powder from the crude solid compound **4**.

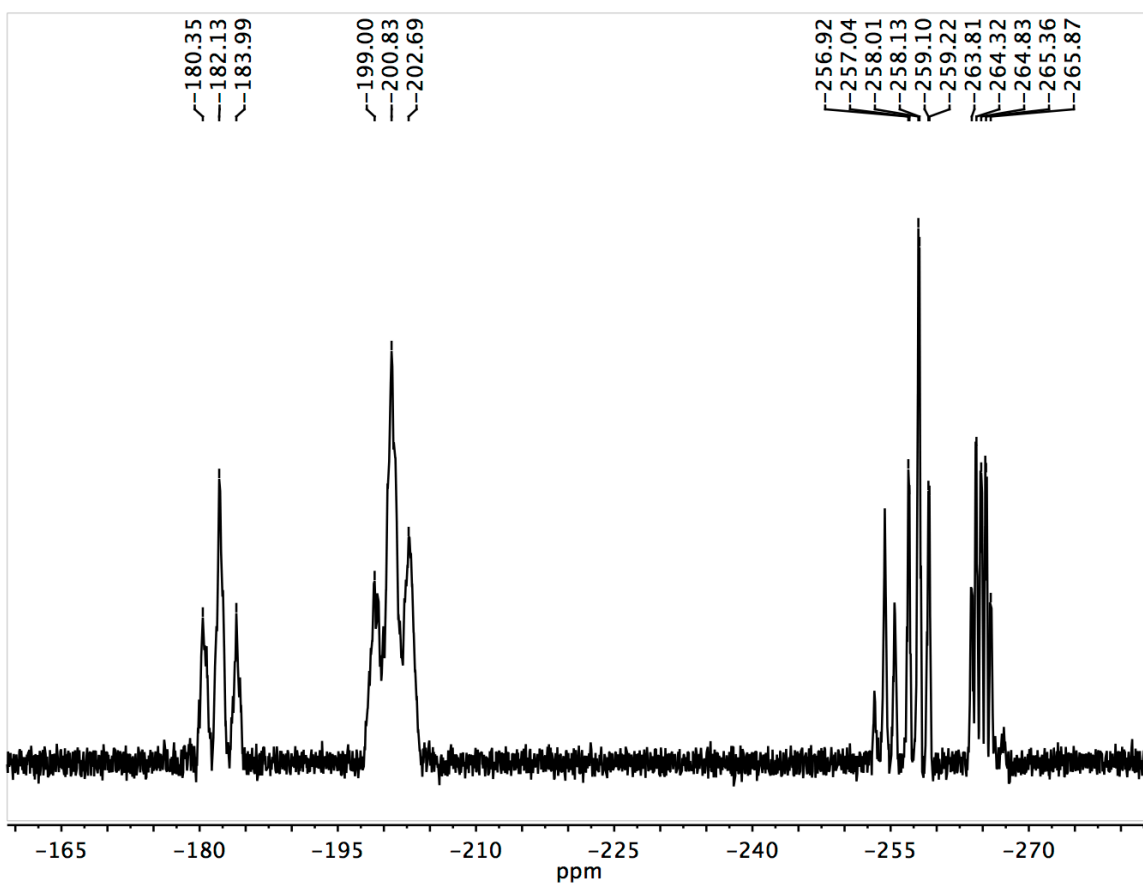

**S2:** Full  $^{31}\text{P}$  NMR spectrum of the redissolved powder from the crude solid of compound **4**.

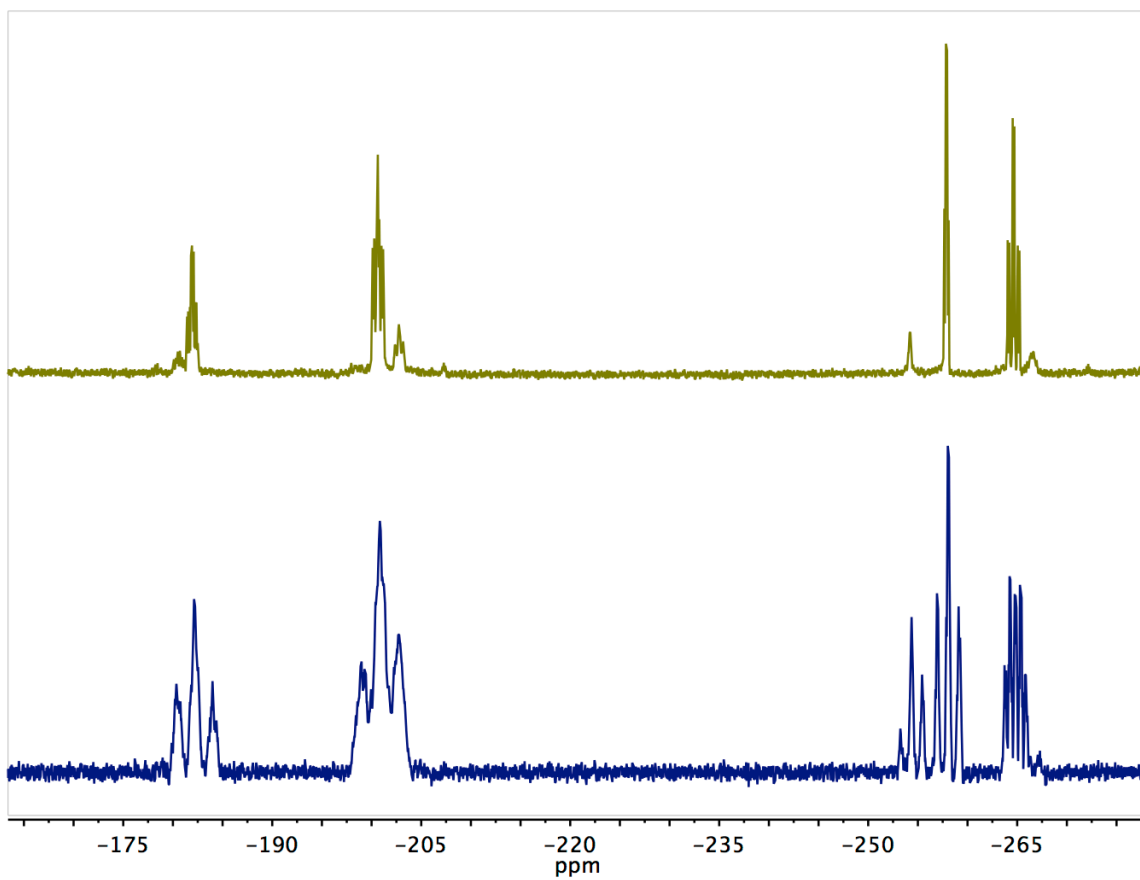

**S3:** Plots of the  $^{31}\text{P}\{^1\text{H}\}$  NMR spectrum (top) and  $^{31}\text{P}$  NMR spectrum (bottom) for compound **4**.

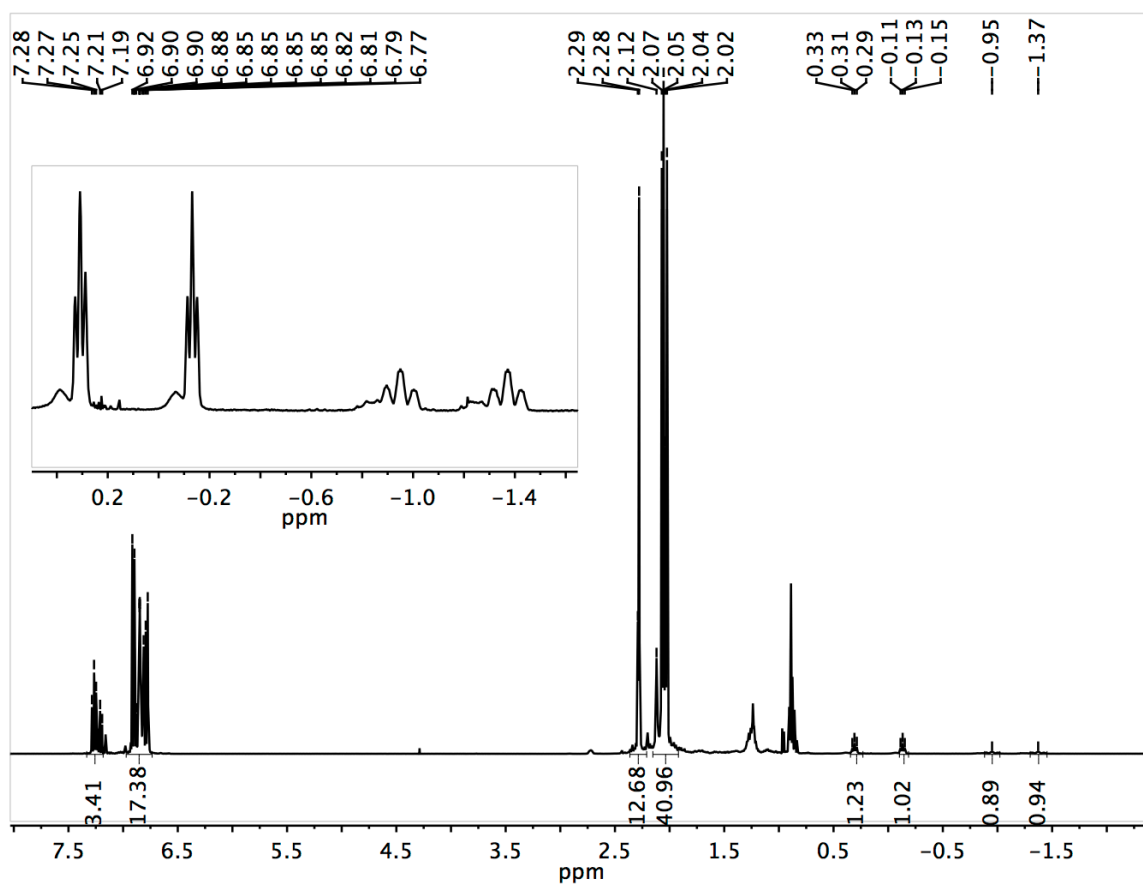

**S4:**  $^1\text{H}$  NMR spectrum for crystallized compound **4**.

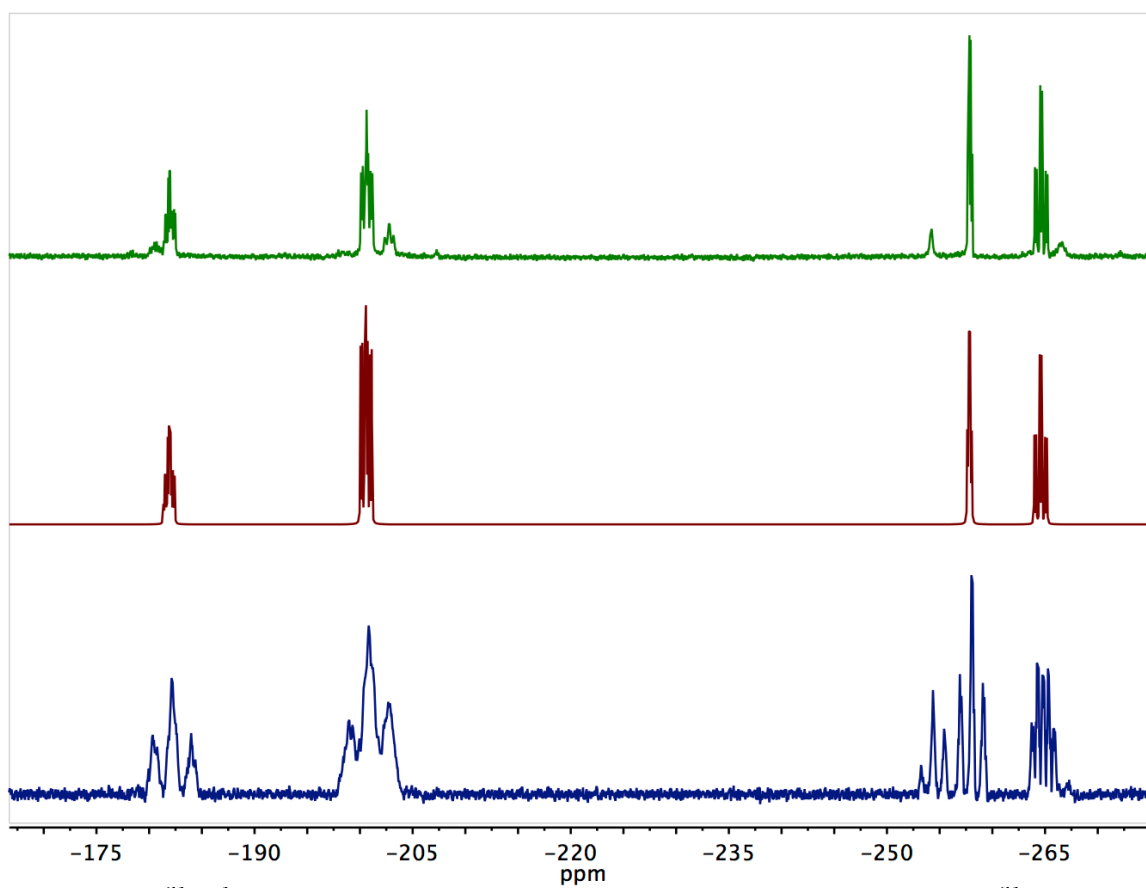

**S5:** Plots of  $^{31}\text{P}\{^1\text{H}\}$  NMR spectrum (top), simulated spectrum (middle), and  $^{31}\text{P}$  NMR spectrum of compound **4** (bottom).

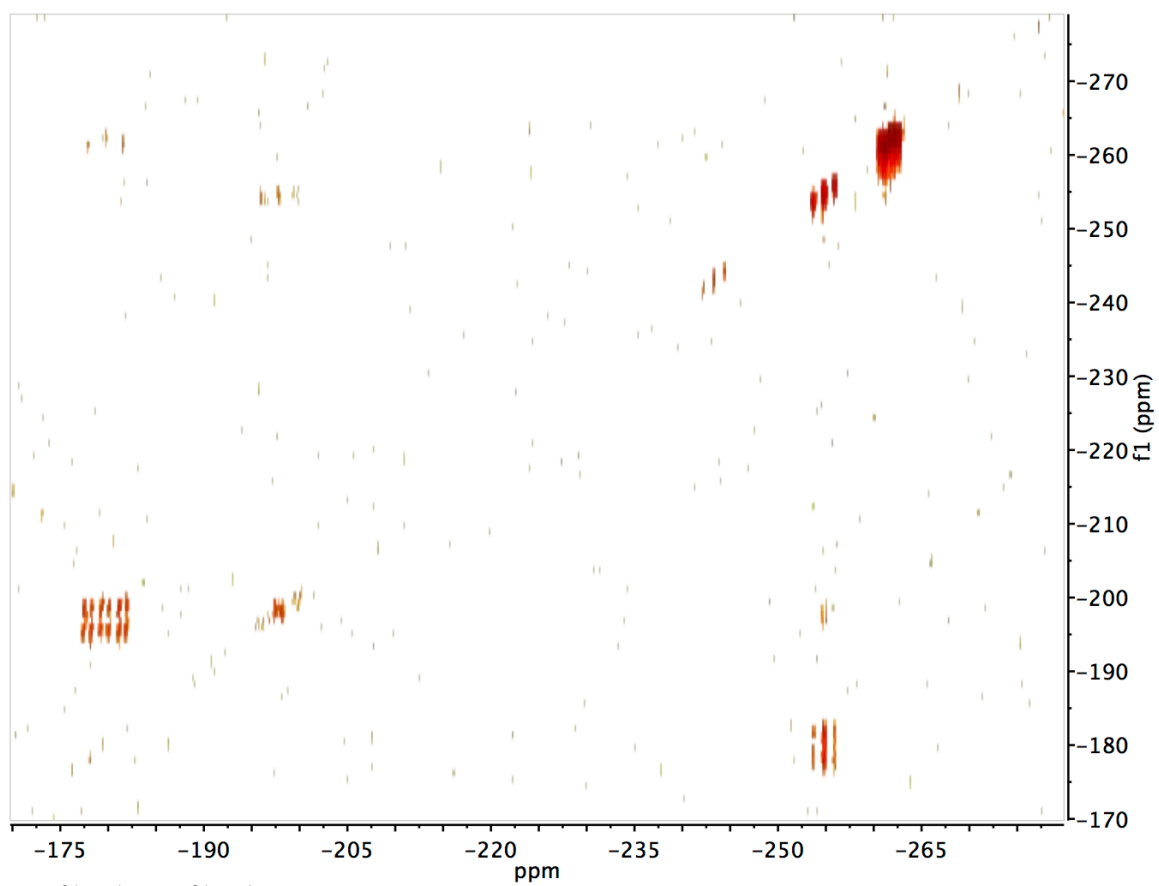

**S6:**  $^{31}\text{P}\{^1\text{H}\} - ^{31}\text{P}\{^1\text{H}\}$  COSY NMR for compound **4**.

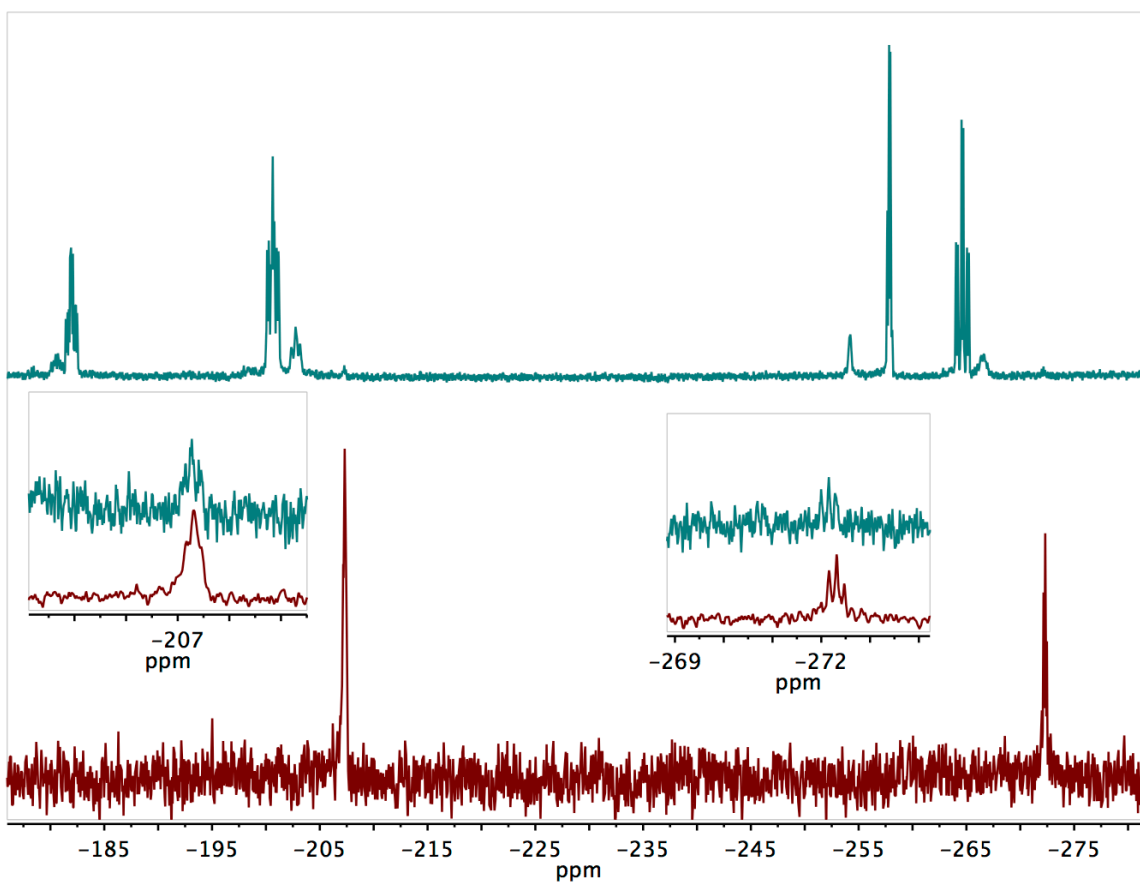

**S7:** Plots of the  $^{31}\text{P}\{^1\text{H}\}$  NMR spectra of the crude solid compound **4** and **5** (top) and small amount of isolated compound **5** (bottom).



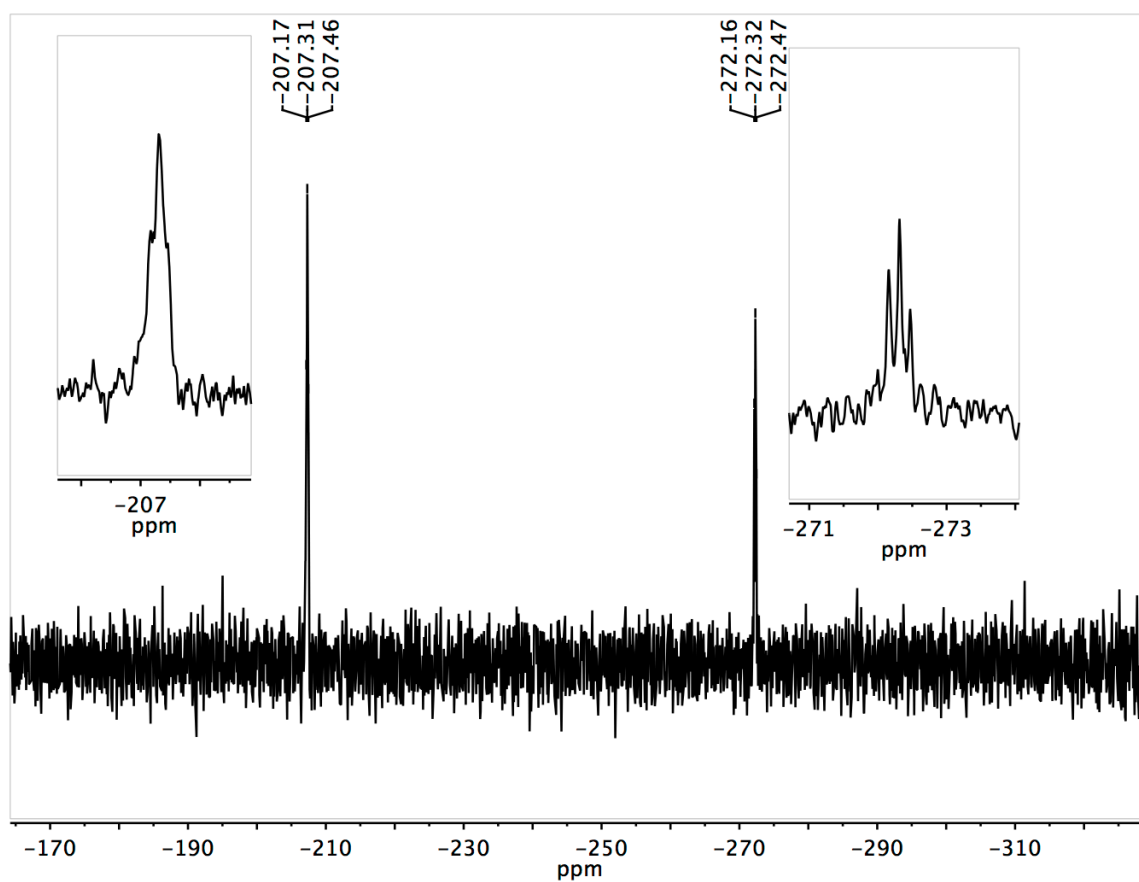

**S8:**  $^{31}\text{P}\{^1\text{H}\}$  NMR spectrum of small amount of isolated compound **5**.

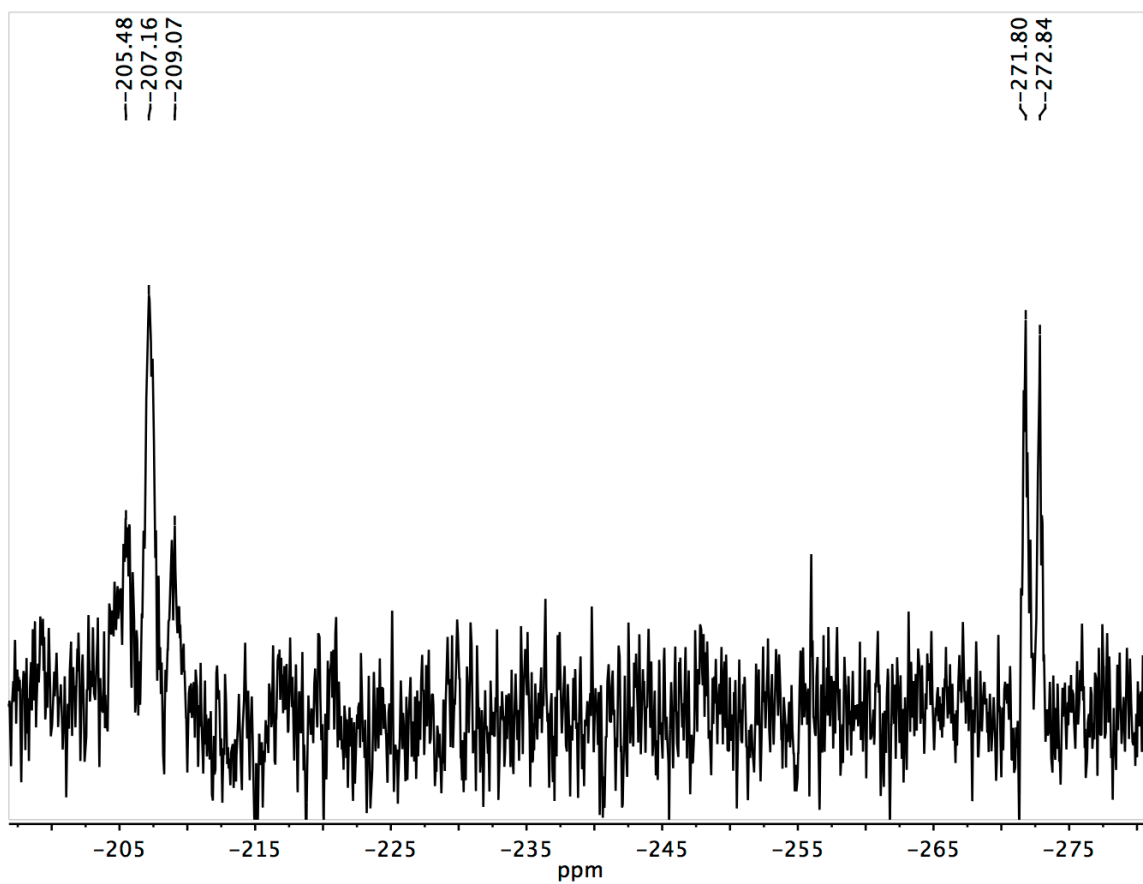

**S9:**  $^{31}\text{P}$  NMR spectrum of small amount of isolated compound **5**.

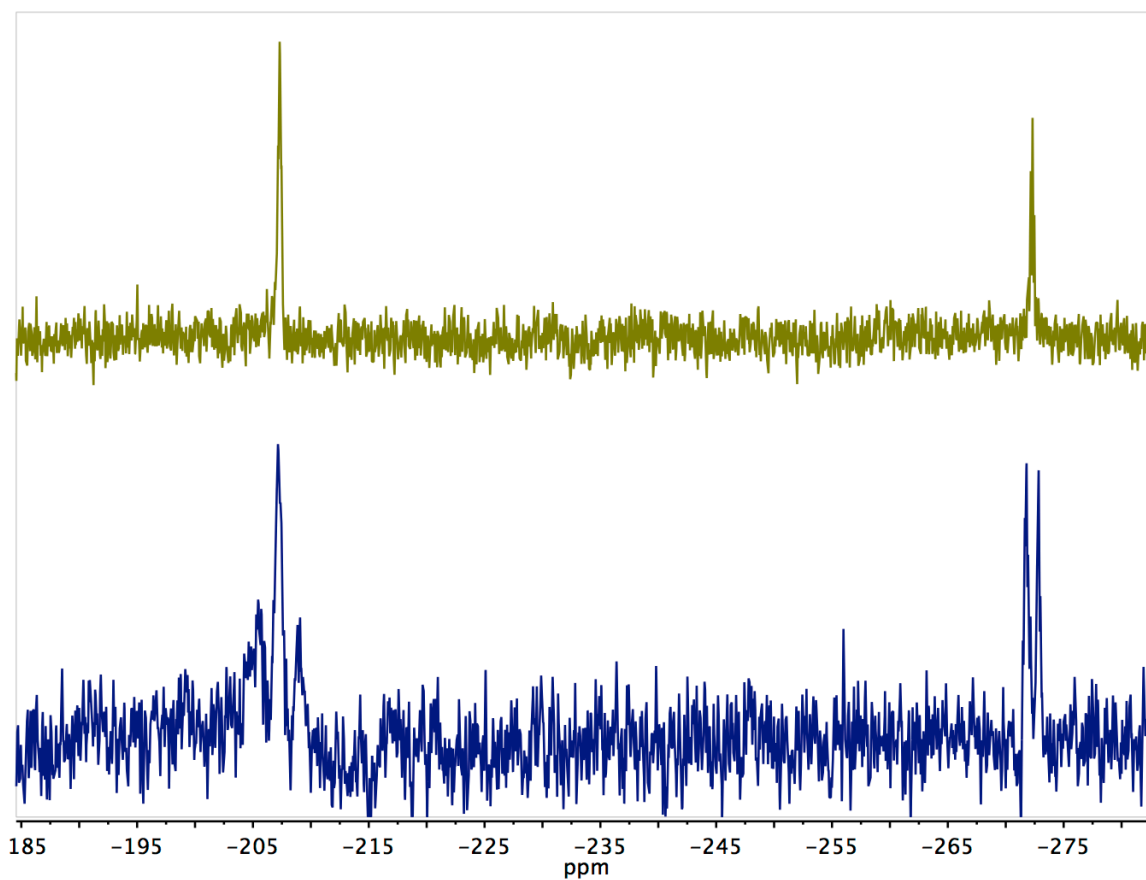

**S10:** Plots of the  $^{31}\text{P}\{^1\text{H}\}$  NMR spectrum (top) and  $^{31}\text{P}$  NMR spectrum (bottom) for compound **5**.

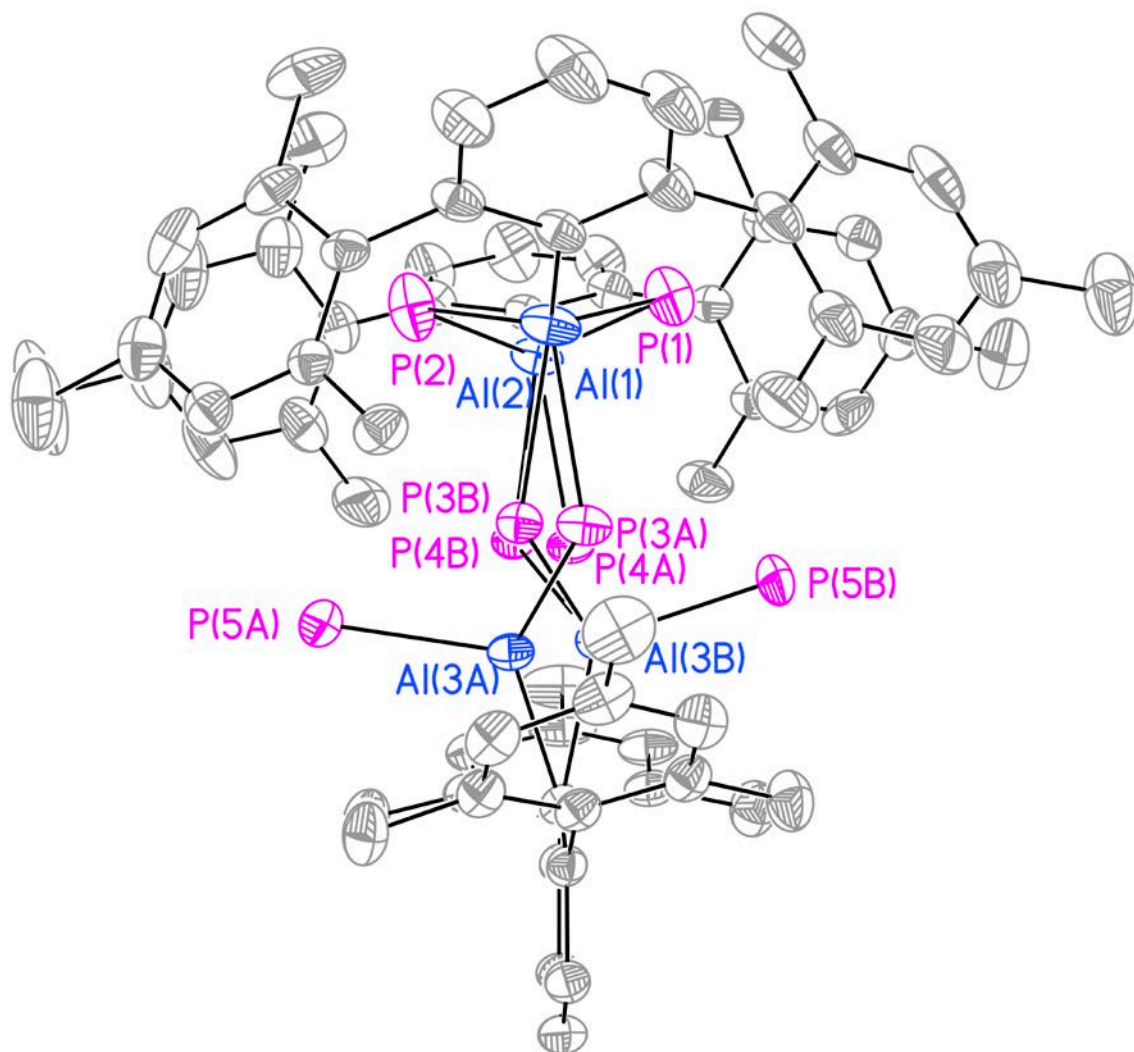

**S11:** Thermal ellipsoid plot of **4** without hydrogens, illustrating the disordered core structure.

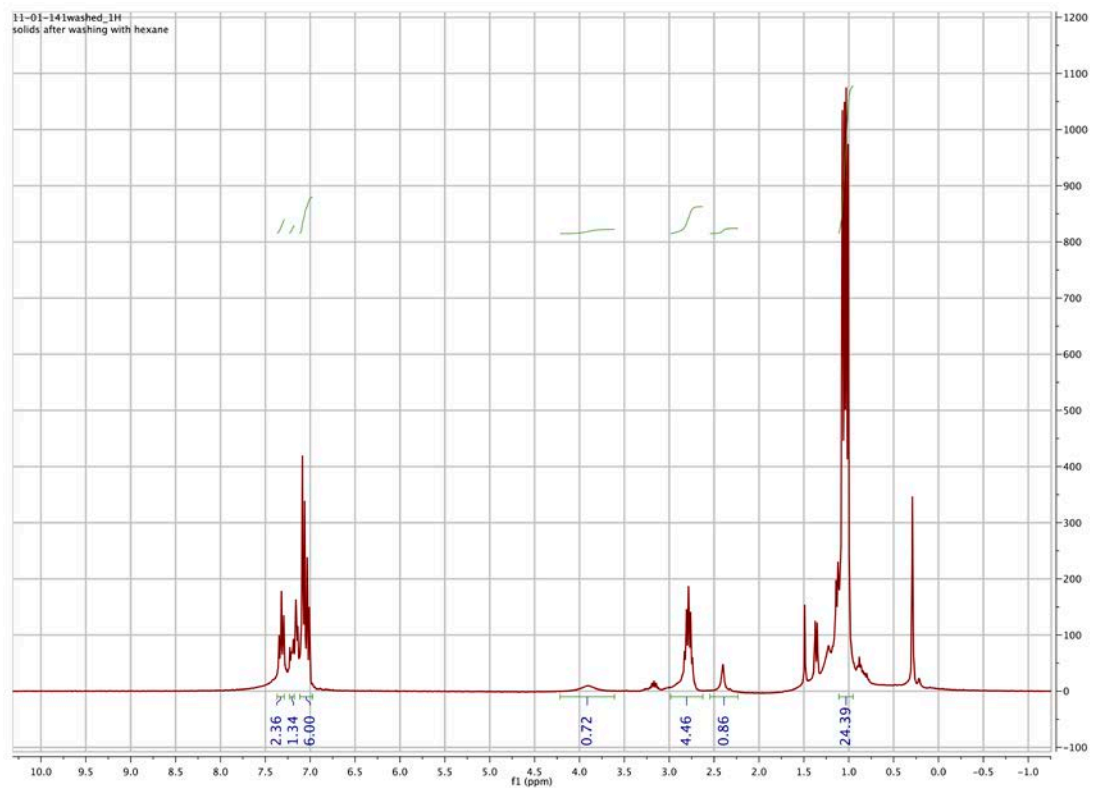

**S12:**  $^1\text{H}$  NMR spectrum of  $(\text{Ar}^{\text{Pr}^i}_4\text{AlH}_2)_2$  in  $\text{C}_6\text{D}_6$  at  $25^\circ\text{C}$ .

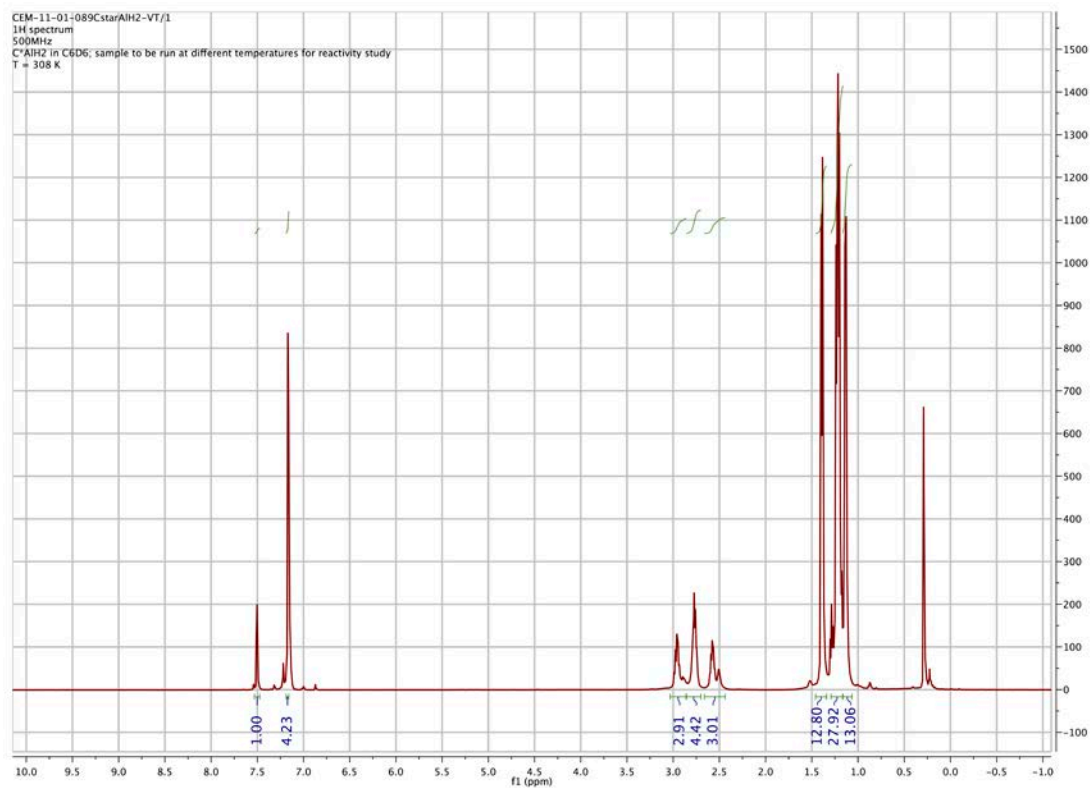

**S13:**  $^1\text{H}$  NMR spectrum of  $(\text{Ar}^{\text{Pr}^8}\text{AlH}_2)_2$  in  $\text{C}_6\text{D}_6$  at 25 °C.

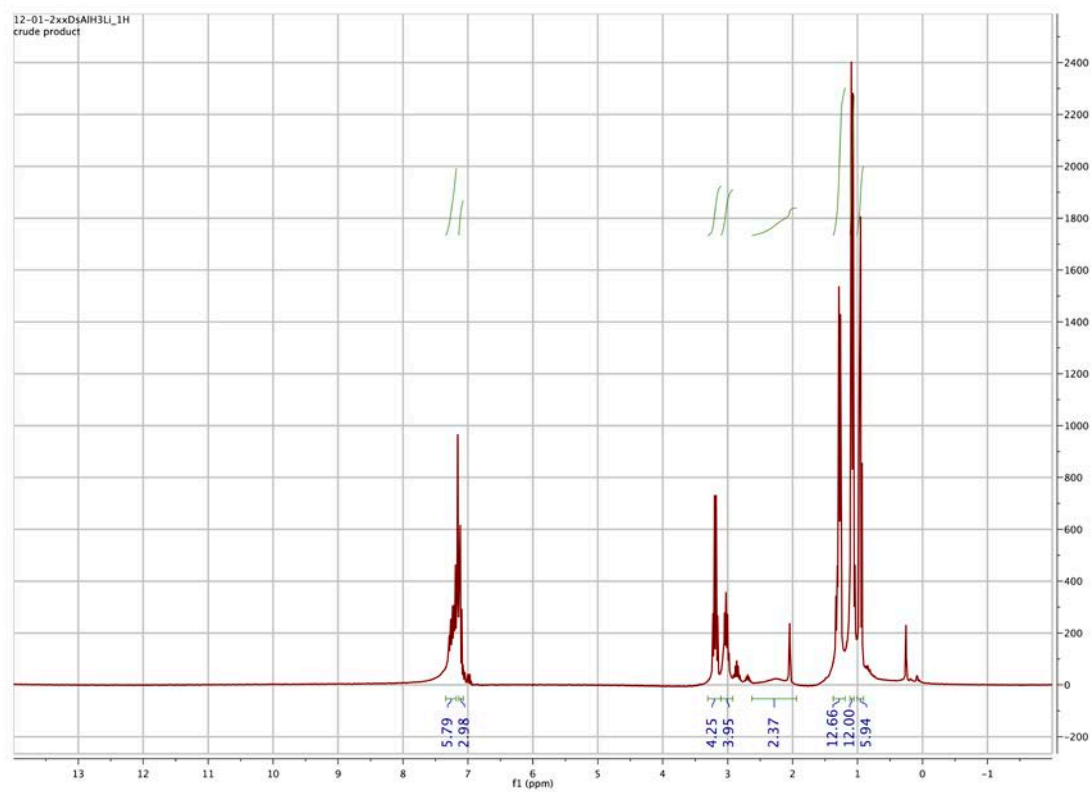

**S14:**  $^1\text{H}$  NMR spectrum  $\text{LiAlH}_3\text{Ar}^{\text{Pr}^4}$  in  $\text{C}_6\text{D}_6$  at  $25\text{ }^\circ\text{C}$ .

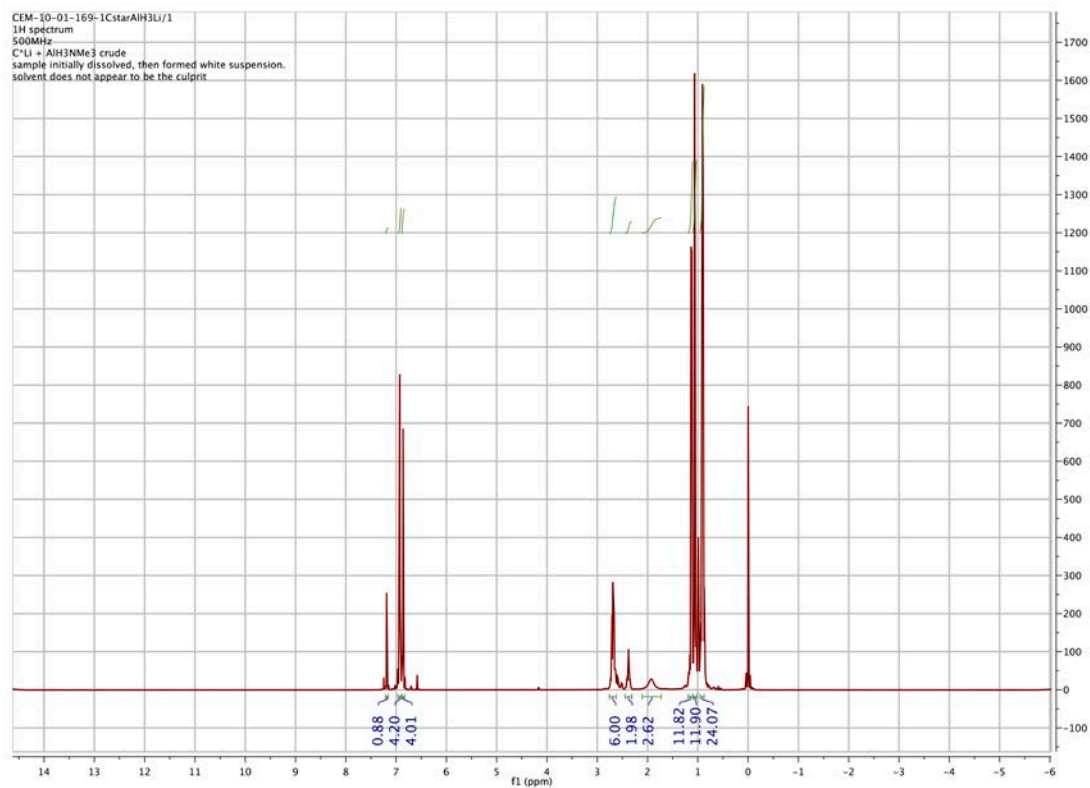

**S15:**  $^1\text{H}$  NMR spectrum of  $\text{LiAlH}_3\text{Ar}^{\text{Pr}^i}_8$  in  $\text{C}_6\text{D}_6$  at 25 °C.



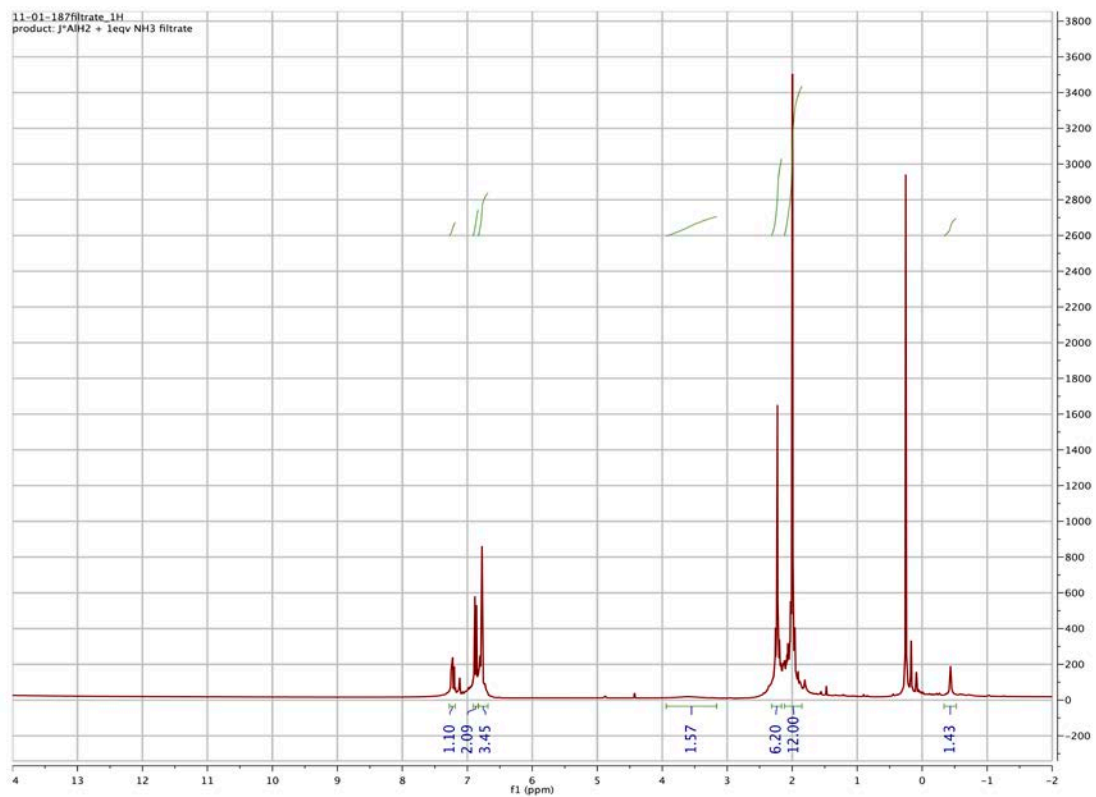

**S16:**  $^1\text{H}$  NMR spectrum of **1** in  $\text{C}_6\text{D}_6$  at  $25^\circ\text{C}$ .

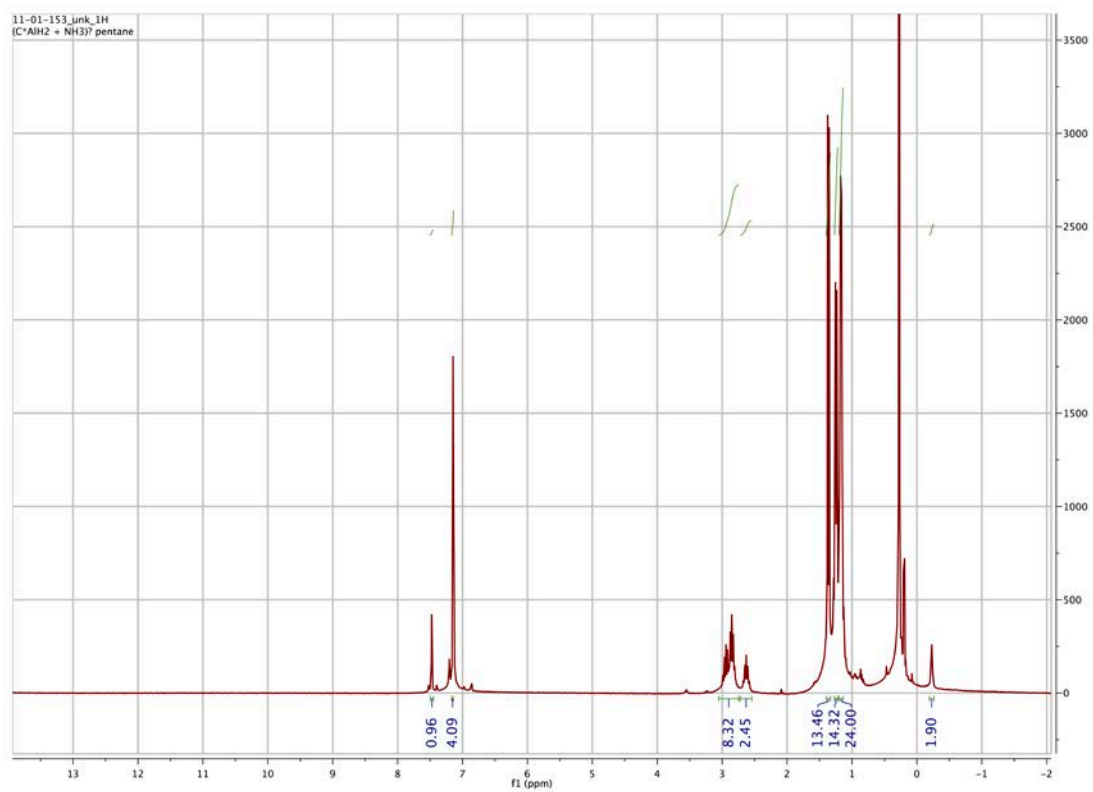

**S17:** <sup>1</sup>H NMR spectrum of **3** in C<sub>6</sub>D<sub>6</sub> at 25 °C.

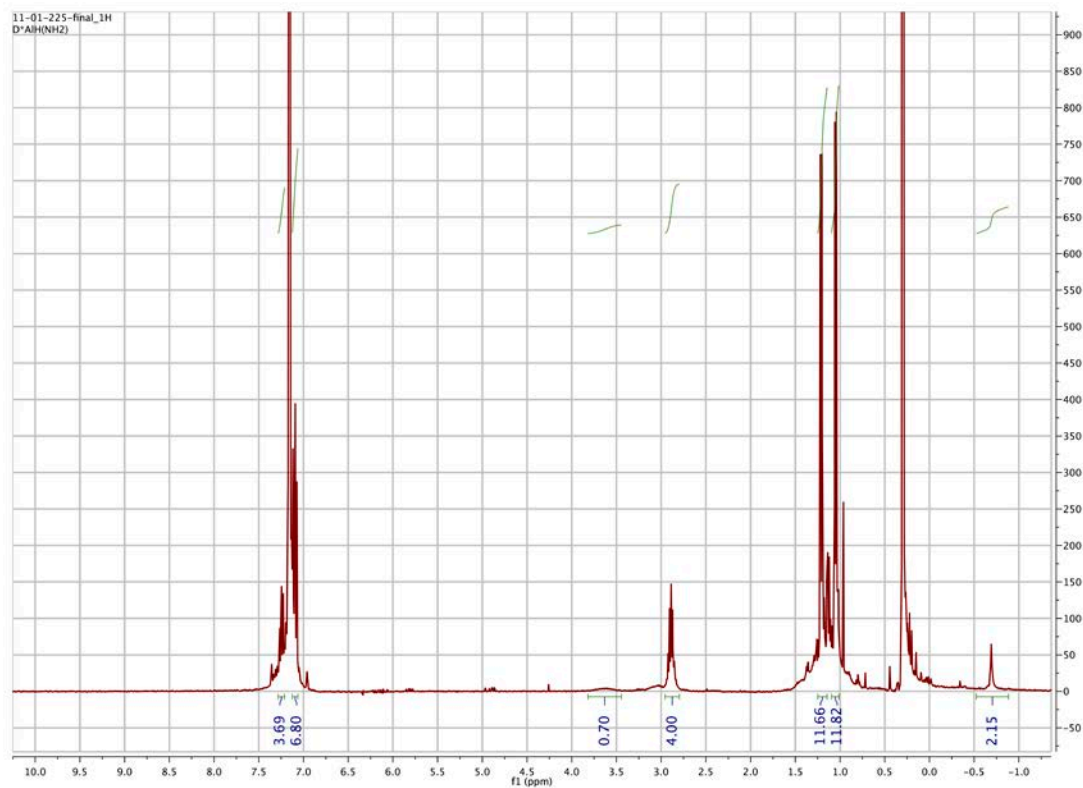

**S18:**  $^1\text{H}$  NMR spectrum of **2** in  $\text{C}_6\text{D}_6$  at 25  $^\circ\text{C}$ .
